# Supplementary material
Source: publisher figshare collection journal article supplement (https://karger.figshare.com/ndownloader/files/28880850)
Supplement: Supplementary file 1 [file 28880850]

**Supplement Figure 1**: Screening flow-chart of A selective-internal radiation therapy (SIRT) and B) external body radiation therapy (EBRT)

**Supplement Figure 2**: Funnel plot of selective-internal radiation therapy (SIRT) A) Response Rate, B) Disease control rate, and external beam radiation therapy (EBRT) C) Response Rate, D) Disease control rate.

**Supplement Figure 3**: Response evaluation criteria in solid tumors (RECIST) radiological response after radiation therapy based on modality. CRT: conventional-dose radiation therapy. DCR: disease control rate. PT: proton-therapy. RR: response rate. SBRT: stereotactic body radiation therapy.
